# Supplementary material for: Polyacrylate-assisted synthesis of stable copper nanoparticles and copper(I) oxide nanocubes with high catalytic efficiency
Source: Royal Society of Chemistry journal article supplement (doi:10.1039/b913561h), 2009-01-01

## Polyacrylate-assisted synthesis of stable copper nanoparticles and copper(I) oxide nanocubes with high catalytic efficiency

Robert Prucek,<sup>\*a</sup> Libor Kvítek,<sup>a</sup> Aleš Panáček,<sup>a</sup> Lenka Vančurová,<sup>a</sup> Jana Soukupová,<sup>a</sup>  
Dalibor Jančík,<sup>b</sup> and Radek Zbořil,<sup>ab</sup>

<sup>a</sup> Department of Physical Chemistry, Faculty of Science, Palacky University, 17 Listopadu 12, Olomouc, 771 46, Czech Republic. Fax: +420 5856 4425; Tel: +420 5856 4427; E-mail: robert.prucek@upol.cz

<sup>b</sup> Centre for Nanomaterial Research, Palacky University, Slechtilu 11, Olomouc, 783 71, Czech Republic.

### Supporting Information

**Figure S1**

XRD pattern of Cu nanoparticles (sample was taken 10 min after their preparation).

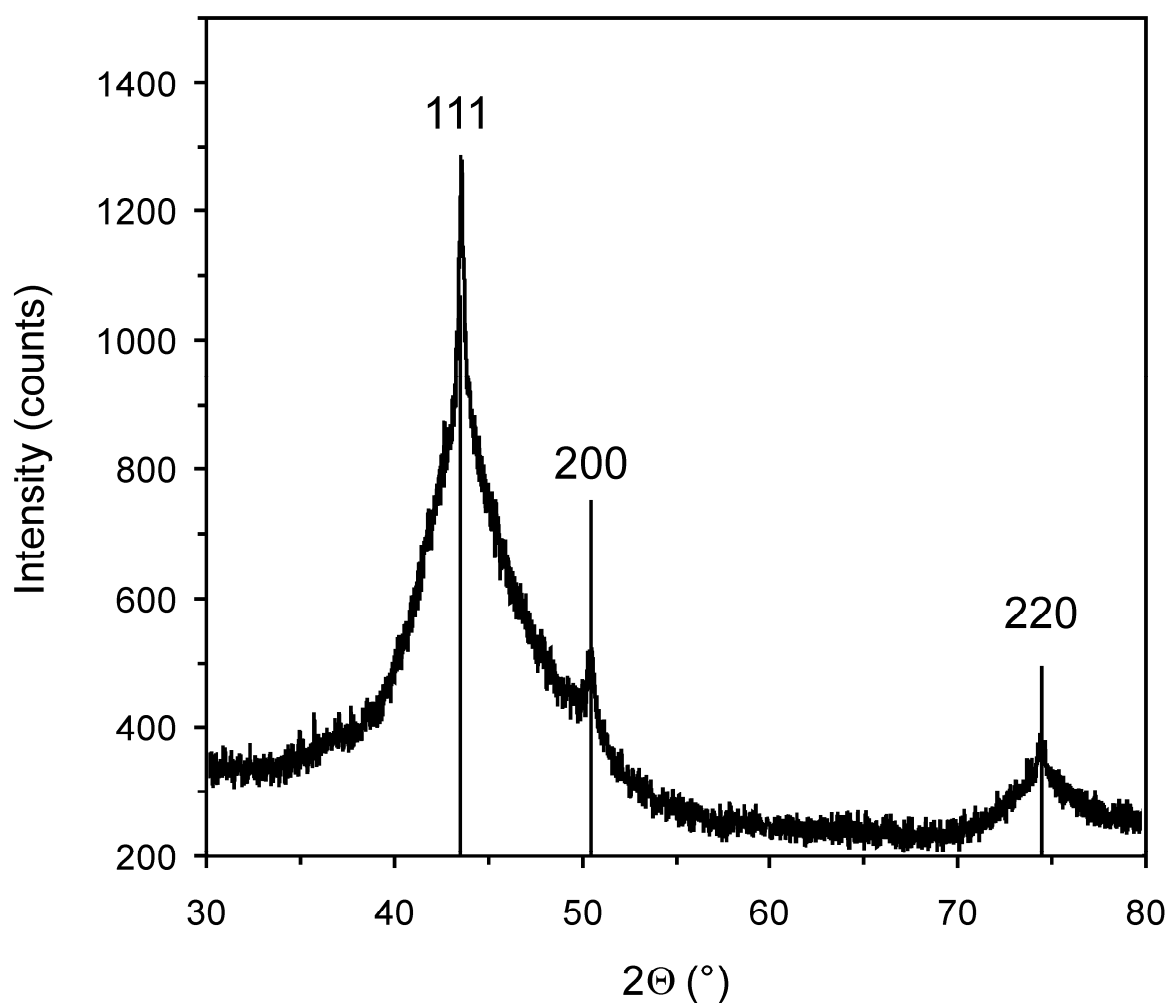

**Figure S2**

The TEM images of the particular copper(I) oxide nanocube were captured at the tilts (A) - 40°, (B) 0° and (C) 40°. The sample was tilted in X-axis direction in the electron transmission microscope.

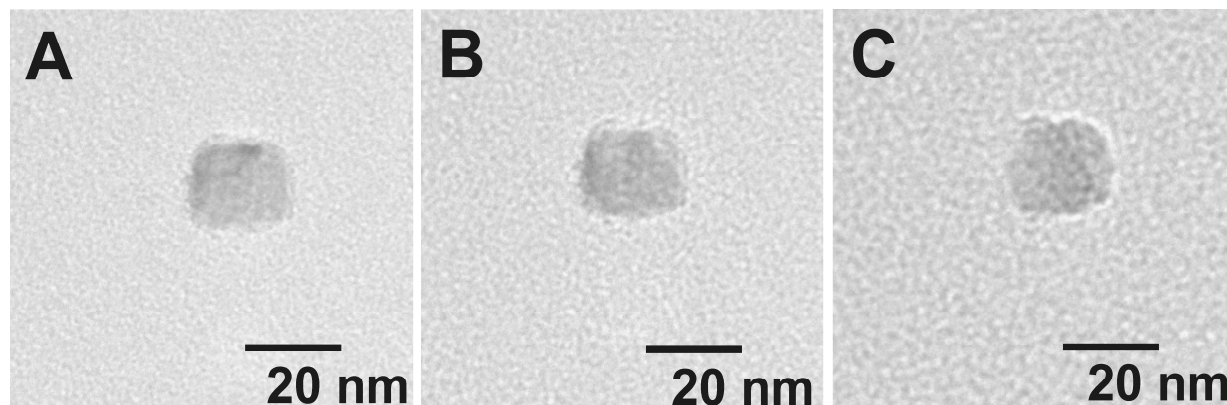

### Figure S3

- (A) The TEM image of the Cu nanoparticles after catalytic reaction. Inset is SAED pattern which consists of rings that could be indexed to face-center-cubic Cu.
- (B) Comparison of obtained SAED pattern with reference entry.

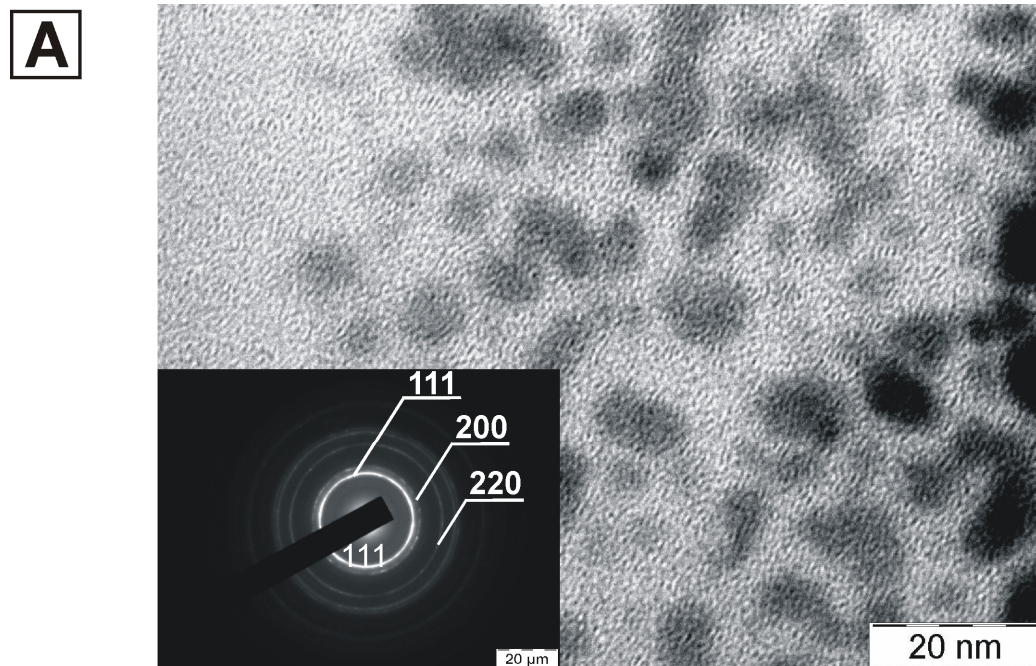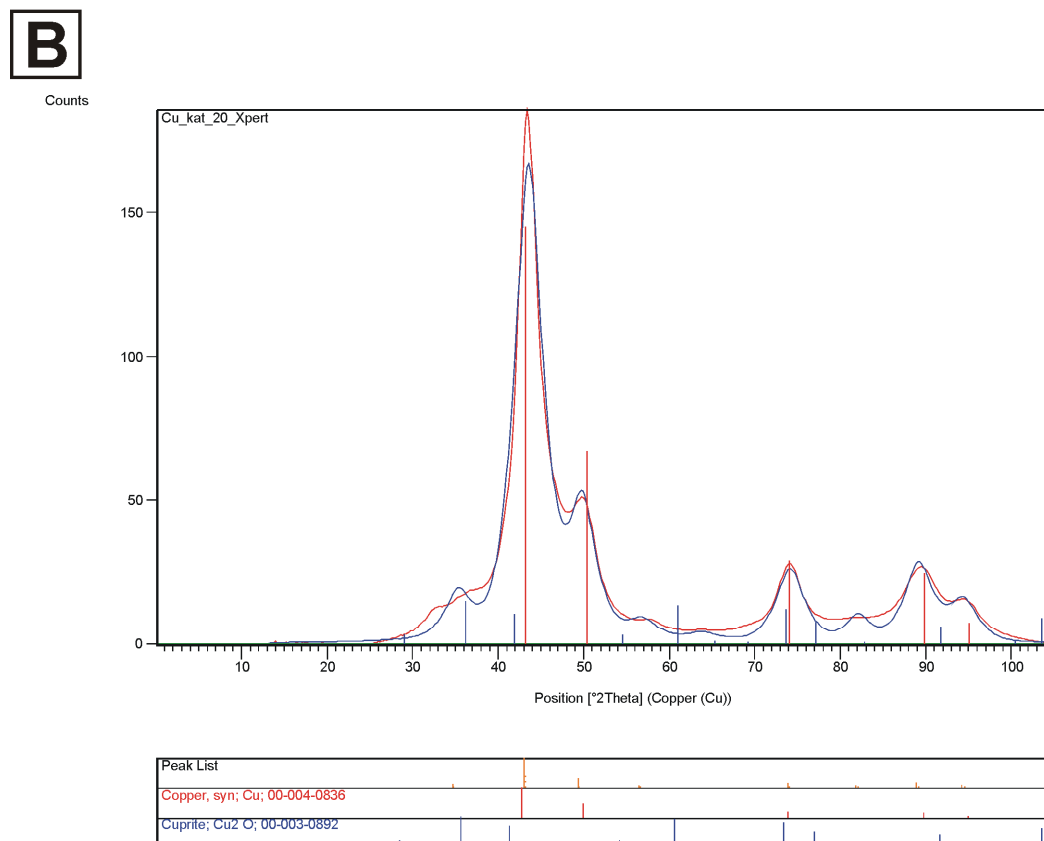

Supplement: b913561h.pdf [file b913561h.pdf]
